# Supplementary material for: Prescription Stimulant Medical and Nonmedical Use Among US Secondary School Students, 2005 to 2020
Source: PubMed Central journal article supplement (PMC10114020; doi:10.1001/jamanetworkopen.2023.8707), 2023-04-18
Supplement: jamanetwopen-e238707-s001.pdf [file jamanetwopen-e238707-s001.pdf]

## Supplemental Online Content

McCabe SE, Schulenberg JE, Wilens TE, Schepis TS, McCabe VV, Veliz PT. Prescription stimulant medical and nonmedical use among US secondary school students, 2005 to 2020. *JAMA Netw Open*. 2023;6(4):e238707. doi:10.1001/jamanetworkopen.2023.8707

**eTable 1.** School-Level and Individual-Level Correlates of Past-Month Nonmedical Use of Prescription Stimulants

**eTable 2.** School-Level and Individual-Level Correlates of Nonmedical Use of Prescription Stimulants (NUPS) Controlling for School-Level NUPS

**eTable 3.** School-Level and Individual-Level Correlates of Nonmedical Use of Prescription Stimulants Among Those Without Stimulant Therapy

**eTable 4.** School-Level and Individual-Level Correlates of Nonmedical Use of Prescription Stimulants With Continuous School-Level Correlates (With Additional Characteristics)

**eTable 5.** School-Level and Individual-Level Correlates of Nonmedical Use of Prescription Stimulants With Continuous School-Level Correlates

**eTable 6.** Bivariate Correlations Between Stimulant Therapy for ADHD and Nonmedical Use of Prescription Stimulants by Secondary School-Level Characteristics, 2005–2020

**eTable 7.** Demographics for School-Level Characteristics

**eTable 8.** Demographics for Individual-Level Characteristics

This supplemental material has been provided by authors to give readers additional information about their work.

**eTable 1. School-level and individual-level correlates of past-month nonmedical use of prescription stimulants**

| Correlates                      | Past-month NUPS<br>(n = 184,120) | Past-month NUPS<br>(n = 222,788) | Past-month NUPS<br>(n = 184,085) |
|---------------------------------|----------------------------------|----------------------------------|----------------------------------|
|                                 | Model 1 <sup>a</sup>             | Model 2 <sup>b</sup>             | Model 3 <sup>c</sup>             |
|                                 | AOR (95% CI)                     | AOR (95% CI)                     | AOR (95% CI)                     |
| Individual-level                |                                  |                                  |                                  |
| Sex                             |                                  |                                  |                                  |
| Male                            | REF                              | ---                              | REF                              |
| Female                          | 1.30 (1.21, 1.40) <sup>***</sup> | ---                              | 1.32 (1.22, 1.42) <sup>***</sup> |
| Race/ethnicity                  |                                  |                                  |                                  |
| White                           | REF                              | ---                              | REF                              |
| Black                           | .741 (.639, .858) <sup>***</sup> | ---                              | .774 (.660, .906) <sup>***</sup> |
| Hispanic                        | .801 (.716, .896) <sup>***</sup> | ---                              | .856 (.755, .970) <sup>*</sup>   |
| Other                           | .996 (.899, 1.10)                | ---                              | 1.03 (.935, 1.15)                |
| Highest parental education      |                                  |                                  |                                  |
| Less than a BA                  | REF                              | ---                              | REF                              |
| BA or higher                    | .990 (.918, 1.06)                | ---                              | .966 (.893, 1.04)                |
| Grade point average             |                                  |                                  |                                  |
| B- or higher                    | REF                              | ---                              | REF                              |
| C+ or lower                     | 1.31 (1.20, 1.42) <sup>***</sup> | ---                              | 1.27 (1.16, 1.39) <sup>***</sup> |
| Binge drinking                  |                                  |                                  |                                  |
| No                              | REF                              | ---                              | REF                              |
| Yes                             | 3.13 (2.87, 3.42) <sup>***</sup> | ---                              | 3.17 (2.89, 3.47) <sup>***</sup> |
| Cigarette smoking               |                                  |                                  |                                  |
| No                              | REF                              | ---                              | REF                              |
| Yes                             | 3.00 (2.76, 3.28) <sup>***</sup> | ---                              | 2.92 (2.66, 3.20) <sup>***</sup> |
| Marijuana use                   |                                  |                                  |                                  |
| No                              | REF                              | ---                              | REF                              |
| Yes                             | 4.17 (3.83, 4.54) <sup>***</sup> | ---                              | 4.41 (4.03, 4.82) <sup>***</sup> |
| Cohort year (individual/school) |                                  |                                  |                                  |
| 2005–2009                       | REF                              | REF                              | REF                              |
| 2010–2014                       | 1.02 (.933, 1.12)                | 1.04 (.970, 1.13)                | 1.06 (.973, 1.17)                |
| 2015–2020                       | 1.14 (1.03, 1.25) <sup>**</sup>  | 1.17 (1.07, 1.28) <sup>***</sup> | 1.24 (1.11, 1.38) <sup>***</sup> |
| School-level                    |                                  |                                  |                                  |
| Private status                  |                                  |                                  |                                  |
| Public school                   | ---                              | REF                              | REF                              |
| Catholic school                 | ---                              | .903 (.751, 1.08)                | .952 (.767, 1.18)                |
| Private school                  | ---                              | .993 (.796, 1.23)                | 1.08 (.848, 1.39)                |
| Grade level                     |                                  |                                  |                                  |
| 8 <sup>th</sup>                 | ---                              | REF                              | REF                              |
| 10 <sup>th</sup>                | ---                              | .976 (.890, 1.07)                | .968 (.863, 1.08)                |
| 12 <sup>th</sup>                | ---                              | .783 (.702, .873) <sup>***</sup> | .731 (.637, .839) <sup>***</sup> |
| Urbanicity of school            |                                  |                                  |                                  |
| Urban                           | ---                              | REF                              | REF                              |
| Suburban                        | ---                              | 1.02 (.946, 1.10)                | 1.02 (.932, 1.11)                |
| Rural                           | ---                              | .999 (.901, 1.10)                | 1.00 (.886, 1.13)                |
| School size                     |                                  |                                  |                                  |
| Small (1 to 86 students)        | ---                              | REF                              | REF                              |
| Medium (87 to 252 students)     | ---                              | .973 (.862, 1.09)                | 1.11 (.966, 1.29)                |
| Large (253 or more)             | ---                              | .942 (.824, 1.07)                | 1.12 (.963, 1.32)                |
| US Census region                |                                  |                                  |                                  |
| Northeast                       | ---                              | REF                              | REF                              |

| Correlates                         | Past-month NUPS<br>(n = 184,120) | Past-month NUPS<br>(n = 222,788) | Past-month NUPS<br>(n = 184,085) |
|------------------------------------|----------------------------------|----------------------------------|----------------------------------|
|                                    | Model 1 <sup>a</sup>             | Model 2 <sup>b</sup>             | Model 3 <sup>c</sup>             |
|                                    | AOR (95% CI)                     | AOR (95% CI)                     | AOR (95% CI)                     |
| Midwest                            | ---                              | 1.26 (1.14, 1.40)***             | 1.34 (1.19, 1.52)***             |
| South                              | ---                              | 1.32 (1.20, 1.46)***             | 1.51 (1.35, 1.70)***             |
| West                               | ---                              | 1.30 (1.16, 1.46)***             | 1.37 (1.19, 1.57)***             |
| Percent with low grades            |                                  |                                  |                                  |
| Low (0% to 12%)                    | ---                              | REF                              | REF                              |
| Medium (13% to 24%)                | ---                              | .988 (.905, 1.07)                | .920 (.827, 1.02)                |
| High (25% to 100%)                 | ---                              | .967 (.872, 1.07)                | .904 (.797, 1.02)                |
| Percent female                     |                                  |                                  |                                  |
| Low (0% to 47%)                    | ---                              | REF                              | REF                              |
| Medium (48% to 54%)                | ---                              | 1.05 (.973, 1.13)                | 1.03 (.946, 1.13)                |
| High (55% to 100%)                 | ---                              | 1.01 (.937, 1.10)                | .953 (.862, 1.05)                |
| Parental education                 |                                  |                                  |                                  |
| Low (0% to 45%)                    | ---                              | REF                              | REF                              |
| Medium (46% to 66%)                | ---                              | 1.08 (.996, 1.17)                | 1.08 (.977, 1.19)                |
| High (67% to 100%)                 | ---                              | 1.10 (.998, 1.22)                | 1.09 (.967, 1.23)                |
| Percent White                      |                                  |                                  |                                  |
| Low (0% to 44%)                    | ---                              | REF                              | REF                              |
| Medium (45% to 77%)                | ---                              | 1.05 (.961, 1.15)                | .987 (.881, 1.10)                |
| High (78% to 100%)                 | ---                              | 1.18 (1.06, 1.32)***             | 1.08 (.950, 1.24)                |
| Percent binge drinking             |                                  |                                  |                                  |
| None (0%)                          | ---                              | REF                              | REF                              |
| Low (1% to 9%)                     | ---                              | 1.12 (.931, 1.35)                | .999 (.793, 1.25)                |
| Medium (10% to 19%)                | ---                              | 1.42 (1.17, 1.73)***             | 1.10 (.863, 1.41)                |
| High (20% to 100%)                 | ---                              | 1.70 (1.38, 2.10)***             | 1.08 (.834, 1.41)                |
| Percent cigarette smoking          |                                  |                                  |                                  |
| None (0%)                          | ---                              | REF                              | REF                              |
| Low (1% to 7%)                     | ---                              | 1.21 (1.04, 1.41)**              | .988 (.826, 1.18)                |
| Medium (8% to 15%)                 | ---                              | 1.54 (1.32, 1.80)***             | 1.05 (.871, 1.27)                |
| High (16% to 100%)                 | ---                              | 2.01 (1.70, 2.38)***             | 1.12 (.911, 1.38)                |
| Percent marijuana use              |                                  |                                  |                                  |
| None (0%)                          | ---                              | REF                              | REF                              |
| Low (1% to 10%)                    | ---                              | 1.50 (1.21, 1.85)***             | 1.08 (.846, 1.38)                |
| Medium (11% to 19%)                | ---                              | 1.87 (1.51, 2.32)***             | 1.00 (.780, 1.30)                |
| High (20% to 100%)                 | ---                              | 2.25 (1.80, 2.81)***             | .943 (.718, 1.23)                |
| Percent stimulant therapy for ADHD |                                  |                                  |                                  |
| None (0%)                          | ---                              | REF                              | REF                              |
| Low (1% to 6%)                     | ---                              | 1.22 (1.07, 1.40)**              | 1.29 (1.10, 1.52)***             |
| Medium (7% to 11%)                 | ---                              | 1.28 (1.12, 1.46)***             | 1.31 (1.11, 1.54)***             |
| High (12% or higher)               | ---                              | 1.57 (1.37, 1.80)***             | 1.59 (1.35, 1.87)***             |

**Abbreviations:** NUPS, nonmedical use of prescription stimulants; AOR, adjusted odds ratio; CI, confidence interval; BA, bachelor's degree; ADHD, attention-deficit/hyperactivity disorder.

**Notes:**

"REF" refers to the reference category. "---" refers to variable not included in the model. Sample sizes vary because of missing data.

<sup>a</sup>Model 1 only includes individual-level predictors/correlates when assessing individual-level past 30-day NUPS.

<sup>b</sup>Model 2 only includes school-level predictors/correlates when assessing individual-level past 30-day NUPS.

<sup>c</sup>Model 3 includes both individual-level and school-level predictors/correlates when assessing individual-level past 30-day NUPS.

\* $P < .05$ , \*\* $P < .01$ , \*\*\* $P < .001$ . \*Indicates a significant difference at the .05 alpha level or lower, \*\*Indicates a significant difference at the .01 alpha level or lower, and \*\*\*Indicates a significant difference at the .001 alpha level or lower.

**eTable 2. School-level and individual-level correlates of nonmedical use of prescription stimulants (NUPS) controlling for school-level NUPS**

| Correlates                      | Past-year NUPS<br>(n = 184,157) | Past-year NUPS<br>(n = 222,852) | Past-year NUPS<br>(n = 184,122) |
|---------------------------------|---------------------------------|---------------------------------|---------------------------------|
|                                 | Model 1 <sup>a</sup>            | Model 2 <sup>b</sup>            | Model 3 <sup>c</sup>            |
|                                 | AOR (95% CI)                    | AOR (95% CI)                    | AOR (95% CI)                    |
| Individual-level                |                                 |                                 |                                 |
| Sex                             |                                 |                                 |                                 |
| Male                            | REF                             | ---                             | REF                             |
| Female                          | 1.29 (1.23, 1.36)***            | ---                             | 1.32 (1.25, 1.39)***            |
| Race/ethnicity                  |                                 |                                 |                                 |
| White                           | REF                             | ---                             | REF                             |
| Black                           | .519 (.461, .584)***            | ---                             | .597 (.531, .671)***            |
| Hispanic                        | .735 (.677, .799)***            | ---                             | .834 (.765, .911)***            |
| Other                           | .946 (.879, 1.02)               | ---                             | 1.02 (.948, 1.10)               |
| Highest parental education      |                                 |                                 |                                 |
| Less than a BA                  | REF                             | ---                             | REF                             |
| BA or higher                    | .972 (.921, 1.02)               | ---                             | .932 (.882, .985)*              |
| Grade point average             |                                 |                                 |                                 |
| B- or higher                    | REF                             | ---                             | REF                             |
| C+ or lower                     | 1.34 (1.26, 1.43)***            | ---                             | 1.35 (1.26, 1.44)***            |
| Binge drinking                  |                                 |                                 |                                 |
| No                              | REF                             | ---                             | REF                             |
| Yes                             | 2.79 (2.61, 2.97)***            | ---                             | 2.89 (2.70, 3.10)***            |
| Cigarette smoking               |                                 |                                 |                                 |
| No                              | REF                             | ---                             | REF                             |
| Yes                             | 3.19 (2.98, 3.41)***            | ---                             | 3.30 (3.07, 3.54)***            |
| Marijuana use                   |                                 |                                 |                                 |
| No                              | REF                             | ---                             | REF                             |
| Yes                             | 3.90 (3.66, 4.15)***            | ---                             | 4.13 (3.87, 4.41)***            |
| Cohort year (individual/school) |                                 |                                 |                                 |
| 2005–2009                       | REF                             | REF                             | REF                             |
| 2010–2014                       | 1.05 (.984, 1.13)               | 1.05 (1.01, 1.08)**             | 1.07 (1.01, 1.12)**             |
| 2015–2020                       | 1.16 (1.08, 1.25)***            | 1.08 (1.04, 1.13)***            | 1.14 (1.08, 1.22)***            |
| School-level                    |                                 |                                 |                                 |
| Private status                  |                                 |                                 |                                 |
| Public school                   | ---                             | REF                             | REF                             |
| Catholic school                 | ---                             | .998 (.925, 1.08)               | 1.04 (.943, 1.15)               |
| Private school                  | ---                             | .974 (.886, 1.07)               | .970 (.858, 1.09)               |
| Grade level                     |                                 |                                 |                                 |
| 8 <sup>th</sup>                 | ---                             | REF                             | REF                             |
| 10 <sup>th</sup>                | ---                             | .984 (.949, 1.02)               | .971 (.917, 1.02)               |
| 12 <sup>th</sup>                | ---                             | .951 (.907, .997)*              | .897 (.833, .967)***            |
| Urbanicity of school            |                                 |                                 |                                 |
| Urban                           | ---                             | REF                             | REF                             |
| Suburban                        | ---                             | .997 (.964, 1.03)               | 1.02 (.967, 1.06)               |
| Rural                           | ---                             | .970 (.925, 1.01)               | .972 (.908, 1.04)               |
| School size                     |                                 |                                 |                                 |
| Small (1 to 86 students)        | ---                             | REF                             | REF                             |
| Medium (87 to 252 students)     | ---                             | .995 (.939, 1.05)               | 1.06 (.990, 1.15)               |
| Large (253 or more)             | ---                             | .959 (.899, 1.02)               | 1.07 (.990, 1.17)               |
| US Census region                |                                 |                                 |                                 |
| Northeast                       | ---                             | REF                             | REF                             |

| Correlates                         | Past-year NUPS<br>(n = 184,157) | Past-year NUPS<br>(n = 222,852)  | Past-year NUPS<br>(n = 184,122)  |
|------------------------------------|---------------------------------|----------------------------------|----------------------------------|
|                                    | Model 1 <sup>a</sup>            | Model 2 <sup>b</sup>             | Model 3 <sup>c</sup>             |
|                                    | AOR (95% CI)                    | AOR (95% CI)                     | AOR (95% CI)                     |
| Midwest                            | ---                             | 1.07 (1.03, 1.12) <sup>***</sup> | 1.13 (1.05, 1.21) <sup>***</sup> |
| South                              | ---                             | 1.07 (1.03, 1.12) <sup>***</sup> | 1.20 (1.13, 1.28) <sup>***</sup> |
| West                               | ---                             | 1.10 (1.05, 1.15) <sup>***</sup> | 1.11 (1.03, 1.19) <sup>**</sup>  |
| Percent with low grades            |                                 |                                  |                                  |
| Low (0% to 12%)                    | ---                             | REF                              | REF                              |
| Medium (13% to 24%)                | ---                             | 1.01 (.939, 1.05)                | .943 (.895, .994) <sup>*</sup>   |
| High (25% to 100%)                 | ---                             | 1.01 (.970, 1.05)                | .915 (.857, .977) <sup>**</sup>  |
| Percent female                     |                                 |                                  |                                  |
| Low (0% to 47%)                    | ---                             | REF                              | REF                              |
| Medium (48% to 54%)                | ---                             | 1.00 (.975, 1.03)                | 1.00 (.953, 1.05)                |
| High (55% to 100%)                 | ---                             | 1.00 (.967, 1.03)                | .952 (.904, 1.00)                |
| Parental education                 |                                 |                                  |                                  |
| Low (0% to 45%)                    | ---                             | REF                              | REF                              |
| Medium (46% to 66%)                | ---                             | 1.03 (.999, 1.06)                | 1.05 (1.00, 1.11) <sup>*</sup>   |
| High (67% to 100%)                 | ---                             | 1.04 (.996, 1.08)                | 1.04 (.978, 1.12)                |
| Percent White                      |                                 |                                  |                                  |
| Low (0% to 44%)                    | ---                             | REF                              | REF                              |
| Medium (45% to 77%)                | ---                             | .987 (.949, 1.02)                | .889 (.838, .943) <sup>***</sup> |
| High (78% to 100%)                 | ---                             | 1.04 (1.00, 1.09) <sup>*</sup>   | .904 (.841, .972) <sup>**</sup>  |
| Percent binge drinking             |                                 |                                  |                                  |
| None (0%)                          | ---                             | REF                              | REF                              |
| Low (1% to 9%)                     | ---                             | 1.15 (1.07, 1.24) <sup>***</sup> | 1.07 (.957, 1.19)                |
| Medium (10% to 19%)                | ---                             | 1.14 (1.05, 1.23) <sup>***</sup> | .917 (.814, 1.03)                |
| High (20% to 100%)                 | ---                             | 1.21 (1.11, 1.31) <sup>***</sup> | .776 (.682, .882) <sup>***</sup> |
| Percent cigarette smoking          |                                 |                                  |                                  |
| None (0%)                          | ---                             | REF                              | REF                              |
| Low (1% to 7%)                     | ---                             | 1.10 (1.07, 1.24) <sup>***</sup> | .888 (.821, .961) <sup>**</sup>  |
| Medium (8% to 15%)                 | ---                             | 1.12 (1.05, 1.23) <sup>***</sup> | .756 (.693, .826) <sup>***</sup> |
| High (16% to 100%)                 | ---                             | 1.22 (1.14, 1.31) <sup>***</sup> | .654 (.590, .725) <sup>***</sup> |
| Percent marijuana use              |                                 |                                  |                                  |
| None (0%)                          | ---                             | REF                              | REF                              |
| Low (1% to 10%)                    | ---                             | 1.25 (1.15, 1.35) <sup>***</sup> | .973 (.872, 1.08)                |
| Medium (11% to 19%)                | ---                             | 1.29 (1.19, 1.41) <sup>***</sup> | .790 (.703, .888) <sup>***</sup> |
| High (20% to 100%)                 | ---                             | 1.34 (1.22, 1.46) <sup>***</sup> | .639 (.562, .726) <sup>***</sup> |
| Percent past-year NUPS             |                                 |                                  |                                  |
| Low (0% to 4%)                     | ---                             | REF                              | REF                              |
| Medium (5% to 8%)                  | ---                             | 3.34 (3.20, 3.48) <sup>***</sup> | 3.60 (3.40, 3.81) <sup>***</sup> |
| High (9% or higher)                | ---                             | 6.64 (6.34, 6.95) <sup>***</sup> | 8.19 (7.69, 8.73) <sup>***</sup> |
| Percent stimulant therapy for ADHD |                                 |                                  |                                  |
| None (0%)                          | ---                             | REF                              | REF                              |
| Low (1% to 6%)                     | ---                             | 1.07 (1.02, 1.13) <sup>**</sup>  | 1.16 (1.07, 1.27) <sup>***</sup> |
| Medium (7% to 11%)                 | ---                             | 1.08 (1.03, 1.14) <sup>**</sup>  | 1.13 (1.04, 1.24) <sup>**</sup>  |
| High (12% or higher)               | ---                             | 1.17 (1.10, 1.23) <sup>***</sup> | 1.21 (1.11, 1.33) <sup>***</sup> |

**Abbreviations:** AOR, adjusted odds ratio; CI, confidence interval; BA, bachelor's degree; ADHD, attention-deficit/hyperactivity disorder.

**Notes:**

"REF" refers to the reference category. "----" refers to variable not included in the model. Sample sizes vary because of missing data.

<sup>a</sup>Model 1 only includes individual-level predictors/correlates when assessing individual-level past-year NUPS.

<sup>b</sup>Model 2 only includes school-level predictors/correlates when assessing individual-level past-year NUPS.

<sup>c</sup>Model 3 includes both individual-level and school-level predictors/correlates when assessing individual-level past-year NUPS.

\* $P < .05$ , \*\* $P < .01$ , \*\*\* $P < .001$ . \*Indicates a significant difference at the .05 alpha level or lower, \*\*Indicates a significant difference at the .01 alpha level or lower, and \*\*\*Indicates a significant difference at the .001 alpha level or lower.

**eTable 3. School-level and individual-level correlates of nonmedical use of prescription stimulants among those without stimulant therapy**

| Correlates                      | Past-year stimulant misuse (n = 156,953) | Past-year stimulant misuse (n = 184,086) | Past-year stimulant misuse (n = 156,919) |
|---------------------------------|------------------------------------------|------------------------------------------|------------------------------------------|
|                                 | Model 1 <sup>a</sup>                     | Model 2 <sup>b</sup>                     | Model 3 <sup>c</sup>                     |
|                                 | AOR (95% CI)                             | AOR (95% CI)                             | AOR (95% CI)                             |
| Individual-level                |                                          |                                          |                                          |
| Sex                             |                                          |                                          |                                          |
| Male                            | REF                                      | ---                                      | REF                                      |
| Female                          | 1.30 (1.23, 1.38) <sup>***</sup>         | ---                                      | 1.32 (1.24, 1.40) <sup>***</sup>         |
| Race/ethnicity                  |                                          |                                          |                                          |
| White                           | REF                                      | ---                                      | REF                                      |
| Black                           | .518 (.451, .595) <sup>***</sup>         | ---                                      | .550 (.475, .636) <sup>***</sup>         |
| Hispanic                        | .747 (.680, .822) <sup>***</sup>         | ---                                      | .809 (.728, .899) <sup>***</sup>         |
| Other                           | .916 (.839, 1.00)                        | ---                                      | .965 (.881, 1.05)                        |
| Highest parental education      |                                          |                                          |                                          |
| Less than a BA                  | REF                                      | ---                                      | REF                                      |
| BA or higher                    | .954 (.898, 1.01)                        | ---                                      | .934 (.877, .995) <sup>*</sup>           |
| Grade point average             |                                          |                                          |                                          |
| B- or higher                    | REF                                      | ---                                      | REF                                      |
| C+ or lower                     | 1.29 (1.20, 1.39) <sup>***</sup>         | ---                                      | 1.28 (1.18, 1.38) <sup>***</sup>         |
| Binge drinking                  |                                          |                                          |                                          |
| No                              | REF                                      | ---                                      | REF                                      |
| Yes                             | 2.80 (2.60, 3.02) <sup>***</sup>         | ---                                      | 2.77 (2.57, 2.99) <sup>***</sup>         |
| Cigarette smoking               |                                          |                                          |                                          |
| No                              | REF                                      | ---                                      | REF                                      |
| Yes                             | 3.23 (2.98, 3.50) <sup>***</sup>         | ---                                      | 3.16 (2.91, 3.43) <sup>***</sup>         |
| Marijuana use                   |                                          |                                          |                                          |
| No                              | REF                                      | ---                                      | REF                                      |
| Yes                             | 3.99 (3.71, 4.29) <sup>***</sup>         | ---                                      | 4.00 (3.71, 4.31) <sup>***</sup>         |
| Cohort year (individual/school) |                                          |                                          |                                          |
| 2005–2009                       | REF                                      | REF                                      | REF                                      |
| 2010–2014                       | 1.03 (.955, 1.12)                        | 1.06 (.994, 1.13)                        | 1.06 (.982, 1.15)                        |
| 2015–2020                       | 1.14 (1.05, 1.24) <sup>***</sup>         | 1.15 (1.06, 1.24) <sup>***</sup>         | 1.25 (1.14, 1.38) <sup>***</sup>         |
| School-level                    |                                          |                                          |                                          |
| Private status                  |                                          |                                          |                                          |
| Public school                   | ---                                      | REF                                      | REF                                      |
| Catholic school                 | ---                                      | 1.03 (.887, 1.20)                        | 1.05 (.879, 1.26)                        |
| Private school                  | ---                                      | 1.00 (.816, 1.22)                        | 1.01 (.807, 1.28)                        |
| Grade level                     |                                          |                                          |                                          |
| 8 <sup>th</sup>                 | ---                                      | REF                                      | REF                                      |
| 10 <sup>th</sup>                | ---                                      | .997 (.919, 1.08)                        | .979 (.885, 1.08)                        |
| 12 <sup>th</sup>                | ---                                      | .872 (.793, .959) <sup>**</sup>          | .820 (.728, .924) <sup>***</sup>         |
| Urbanicity of school            |                                          |                                          |                                          |
| Urban                           | ---                                      | REF                                      | REF                                      |
| Suburban                        | ---                                      | 1.04 (.974, 1.11)                        | 1.07 (.988, 1.16)                        |
| Rural                           | ---                                      | 1.01 (.923, 1.11)                        | 1.01 (.903, 1.13)                        |
| School size                     |                                          |                                          |                                          |
| Small (1 to 86 students)        | ---                                      | REF                                      | REF                                      |
| Medium (87 to 252 students)     | ---                                      | .953 (.855, 1.60)                        | 1.03 (.913, 1.17)                        |
| Large (253 or more)             | ---                                      | 1.00 (.888, 1.13)                        | 1.12 (.976, 1.29)                        |
| US Census region                |                                          |                                          |                                          |
| Northeast                       | ---                                      | REF                                      | REF                                      |

| Correlates                         | Past-year stimulant misuse (n = 156,953) | Past-year stimulant misuse (n = 184,086) | Past-year stimulant misuse (n = 156,919) |
|------------------------------------|------------------------------------------|------------------------------------------|------------------------------------------|
|                                    | Model 1 <sup>a</sup>                     | Model 2 <sup>b</sup>                     | Model 3 <sup>c</sup>                     |
|                                    | AOR (95% CI)                             | AOR (95% CI)                             | AOR (95% CI)                             |
| Midwest                            | ---                                      | 1.34 (1.22, 1.46)***                     | 1.42 (1.28, 1.59)***                     |
| South                              | ---                                      | 1.41 (1.30, 1.54)***                     | 1.60 (1.43, 1.78)***                     |
| West                               | ---                                      | 1.44 (1.30, 1.59)***                     | 1.48 (1.31, 1.68)***                     |
| Percent with low grades            |                                          |                                          |                                          |
| Low (0% to 12%)                    | ---                                      | REF                                      | REF                                      |
| Medium (13% to 24%)                | ---                                      | 1.01 (.945, 1.09)                        | .964 (.884, 1.05)                        |
| High (25% to 100%)                 | ---                                      | .985 (.905, 1.07)                        | .906 (.817, 1.00)                        |
| Percent female                     |                                          |                                          |                                          |
| Low (0% to 47%)                    | ---                                      | REF                                      | REF                                      |
| Medium (48% to 54%)                | ---                                      | 1.06 (1.00, 1.13)*                       | 1.05 (.978, 1.13)                        |
| High (55% to 100%)                 | ---                                      | 1.03 (.967, 1.10)                        | .986 (.909, 1.07)                        |
| Parental education                 |                                          |                                          |                                          |
| Low (0% to 45%)                    | ---                                      | REF                                      | REF                                      |
| Medium (46% to 66%)                | ---                                      | 1.13 (1.06, 1.22)***                     | 1.17 (1.07, 1.28)***                     |
| High (67% to 100%)                 | ---                                      | 1.11 (1.02, 1.21)*                       | 1.10 (.991, 1.22)                        |
| Percent White                      |                                          |                                          |                                          |
| Low (0% to 44%)                    | ---                                      | REF                                      | REF                                      |
| Medium (45% to 77%)                | ---                                      | 1.16 (1.08, 1.26)***                     | 1.03 (.939, 1.14)                        |
| High (78% to 100%)                 | ---                                      | 1.33 (1.22, 1.46)***                     | 1.14 (1.02, 1.28)*                       |
| Percent binge drinking             |                                          |                                          |                                          |
| None (0%)                          | ---                                      | REF                                      | REF                                      |
| Low (1% to 9%)                     | ---                                      | 1.16 (1.00, 1.35)*                       | 1.11 (.929, 1.34)                        |
| Medium (10% to 19%)                | ---                                      | 1.53 (1.31, 1.79)***                     | 1.29 (1.07, 1.57)**                      |
| High (20% to 100%)                 | ---                                      | 1.78 (1.51, 2.10)***                     | 1.22 (.994, 1.50)                        |
| Percent cigarette smoking          |                                          |                                          |                                          |
| None (0%)                          | ---                                      | REF                                      | REF                                      |
| Low (1% to 7%)                     | ---                                      | 1.07 (.952, 1.21)                        | .879 (.761, 1.01)                        |
| Medium (8% to 15%)                 | ---                                      | 1.35 (1.18, 1.54)***                     | .983 (.840, 1.15)                        |
| High (16% to 100%)                 | ---                                      | 1.75 (1.51, 2.30)***                     | 1.03 (.872, 1.23)                        |
| Percent marijuana use              |                                          |                                          |                                          |
| None (0%)                          | ---                                      | REF                                      | REF                                      |
| Low (1% to 10%)                    | ---                                      | 1.57 (1.33, 1.85)***                     | 1.22 (1.02, 1.47)*                       |
| Medium (11% to 19%)                | ---                                      | 1.95 (1.64, 2.31)***                     | 1.21 (1.00, 1.46)*                       |
| High (20% to 100%)                 | ---                                      | 2.43 (2.03, 2.91)***                     | 1.21 (.992, 1.48)                        |
| Percent stimulant therapy for ADHD |                                          |                                          |                                          |
| None (0%)                          | ---                                      | REF                                      | REF                                      |
| Low (1% to 6%)                     | ---                                      | 1.08 (.974, 1.20)                        | 1.18 (1.04, 1.35)**                      |
| Medium (7% to 11%)                 | ---                                      | 1.13 (1.02, 1.26)*                       | 1.24 (1.09, 1.41)***                     |
| High (12% or higher)               | ---                                      | 1.17 (1.05, 1.31)*                       | 1.33 (1.16, 1.52)***                     |

**Abbreviations:** ADHD, attention-deficit/hyperactivity disorder; AOR, adjusted odds ratio; CI, confidence interval; BA, bachelor's degree; NUPS, nonmedical use of prescription stimulants.

**Notes:**

"REF" refers to the reference category. "---" refers to variable not included in the model. Sample sizes vary because of missing data.

<sup>a</sup>Model 1 only includes individual-level predictors/correlates when assessing individual-level past-year NUPS.

<sup>b</sup>Model 2 only includes school-level predictors/correlates when assessing individual-level past-year NUPS.

<sup>c</sup>Model 3 includes both individual-level and school-level predictors/correlates when assessing individual-level past-year NUPS.

\* $P < .05$ , \*\* $P < .01$ , \*\*\* $P < .001$ . \*Indicates a significant difference at the .05 alpha level or lower, \*\*Indicates a significant difference at the .01 alpha level or lower, and \*\*\*Indicates a significant difference at the .001 alpha level or lower.

**eTable 4. School-level and individual-level correlates of nonmedical use of prescription stimulants with continuous school-level correlates (with additional characteristics)**

| Correlates                      | Past-year NUPS<br>(n = 184,157) | Past-year NUPS<br>(n = 222,846) | Past-year NUPS<br>(n = 184,121) |
|---------------------------------|---------------------------------|---------------------------------|---------------------------------|
|                                 | Model 1 <sup>a</sup>            | Model 2 <sup>b</sup>            | Model 3 <sup>c</sup>            |
|                                 | AOR (95% CI)                    | AOR (95% CI)                    | AOR (95% CI)                    |
| Individual-level                |                                 |                                 |                                 |
| Sex                             |                                 |                                 |                                 |
| Male                            | REF                             | ---                             | REF                             |
| Female                          | 1.29 (1.23, 1.36)***            | ---                             | 1.31 (1.24, 1.38)***            |
| Race/ethnicity                  |                                 |                                 |                                 |
| White                           | REF                             | ---                             | REF                             |
| Black                           | .519 (.461, .584)***            | ---                             | .571 (.504, .646)***            |
| Hispanic                        | .735 (.677, .799)***            | ---                             | .844 (.770, .925)***            |
| Other                           | .946 (.879, 1.02)               | ---                             | 1.01 (.940, 1.09)               |
| Highest parental education      |                                 |                                 |                                 |
| Less than a BA                  | REF                             | ---                             | REF                             |
| BA or higher                    | .972 (.921, 1.02)               | ---                             | .933 (.882, .986)*              |
| Grade point average             |                                 |                                 |                                 |
| B- or higher                    | REF                             | ---                             | REF                             |
| C+ or lower                     | 1.34 (1.26, 1.43)***            | ---                             | 1.34 (1.25, 1.43)***            |
| Binge drinking                  |                                 |                                 |                                 |
| No                              | REF                             | ---                             | REF                             |
| Yes                             | 2.79 (2.61, 2.97)***            | ---                             | 2.81 (2.63, 3.00)***            |
| Cigarette smoking               |                                 |                                 |                                 |
| No                              | REF                             | ---                             | REF                             |
| Yes                             | 3.19 (2.98, 3.41)***            | ---                             | 3.14 (2.93, 3.37)***            |
| Marijuana use                   |                                 |                                 |                                 |
| No                              | REF                             | ---                             | REF                             |
| Yes                             | 3.90 (3.66, 4.15)***            | ---                             | 3.92 (3.68, 4.18)***            |
| Cohort year (individual/school) |                                 |                                 |                                 |
| 2005–2009                       | REF                             | REF                             | REF                             |
| 2010–2014                       | 1.05 (.984, 1.13)               | 1.06 (1.00, 1.13)*              | 1.06 (.992, 1.14)               |
| 2015–2020                       | 1.16 (1.08, 1.25)***            | 1.11 (1.04, 1.19)**             | 1.18 (1.08, 1.28)***            |
| School-level                    |                                 |                                 |                                 |
| Private status                  |                                 |                                 |                                 |
| Public school                   | ---                             | REF                             | REF                             |
| Catholic school                 | ---                             | .960 (.835, 1.10)               | 1.00 (.852, 1.19)               |
| Private school                  | ---                             | .947 (.726, .989)*              | .875 (.731, 1.04)               |
| Grade level                     |                                 |                                 |                                 |
| 8 <sup>th</sup>                 | ---                             | REF                             | REF                             |
| 10 <sup>th</sup>                | ---                             | 1.14 (1.06, 1.22)***            | 1.08 (.993, 1.17)               |
| 12 <sup>th</sup>                | ---                             | .946 (.870, 1.02)               | .872 (.786, .967)**             |
| Urbanicity of school            |                                 |                                 |                                 |
| Urban                           | ---                             | REF                             | REF                             |
| Suburban                        | ---                             | 1.07 (1.01, 1.13)*              | 1.08 (1.01, 1.16)*              |
| Rural                           | ---                             | .990 (.913, 1.07)               | .981 (.887, 1.08)               |
| School size (continuous)        | ---                             | 1.00 (1.00, 1.00)***            | 1.00 (1.00, 1.00)*              |
| US Census region                |                                 |                                 |                                 |
| Northeast                       | ---                             | REF                             | REF                             |
| Midwest                         | ---                             | 1.30 (1.20, 1.40)***            | 1.36 (1.23, 1.50)***            |



| Correlates                                      | Past-year NUPS<br>(n = 184,157) | Past-year NUPS<br>(n = 222,846) | Past-year NUPS<br>(n = 184,121) |
|-------------------------------------------------|---------------------------------|---------------------------------|---------------------------------|
|                                                 | Model 1 <sup>a</sup>            | Model 2 <sup>b</sup>            | Model 3 <sup>c</sup>            |
|                                                 | AOR (95% CI)                    | AOR (95% CI)                    | AOR (95% CI)                    |
| South                                           | ---                             | 1.42 (1.31, 1.53)***            | 1.53 (1.39, 1.69)***            |
| West                                            | ---                             | 1.38 (1.27, 1.51)***            | 1.40 (1.25, 1.56)***            |
| Percent with low grades (continuous)            | ---                             | 1.04 (.828, 1.31)               | .701 (.517, .950)*              |
| Percent female (continuous)                     | ---                             | 1.32 (1.06, 1.64)*              | .958 (.730, 1.25)               |
| Parental education (continuous)                 | ---                             | 1.13 (.958, 1.33)               | 1.19 (.962, 1.48)               |
| Percent White (continuous)                      | ---                             | 1.70 (1.51, 1.90)***            | 1.27 (1.09, 1.49)**             |
| Percent binge drinking (continuous)             | ---                             | 2.94 (2.18, 3.98)***            | .981 (.666, 1.44)               |
| Percent cigarette use (continuous)              | ---                             | 5.95 (4.14, 8.54)***            | 1.12 (.711, 1.76)               |
| Percent marijuana use (continuous)              | ---                             | 6.61 (4.98, 8.78)***            | 1.17 (.802, 1.71)               |
| Percent stimulant therapy for ADHD (continuous) | ---                             | 7.37 (4.90, 11.1)***            | 10.8 (16.65, 17.5)***           |

**Abbreviations:** NUPS, nonmedical use of prescription stimulants; AOR, adjusted odds ratio; CI, confidence interval; BA, bachelor's degree; ADHD, attention-deficit/hyperactivity disorder.

**Notes:**

"REF" refers to the reference category. "---" refers to variable not included in the model. Sample sizes vary because of missing data.

<sup>a</sup>Model 1 only includes individual-level predictors/correlates when assessing individual-level past-year NUPS.

<sup>b</sup>Model 2 only includes school-level predictors/correlates when assessing individual-level past-year NUPS.

<sup>c</sup>Model 3 includes both individual-level and school-level predictors/correlates when assessing individual-level past-year NUPS.

\* $P < .05$ , \*\* $P < .01$ , \*\*\* $P < .001$ . \*Indicates a significant difference at the .05 alpha level or lower, \*\*Indicates a significant difference at the .01 alpha level or lower, and \*\*\*Indicates a significant difference at the .001 alpha level or lower.

**eTable 5. School-level and individual-level correlates of nonmedical use of prescription stimulants with continuous school-level correlates**

| Correlates                                                            | Past-year NUPS<br>(n = 169,823)  | Past-Year NUPS<br>(n = 169,788)  |
|-----------------------------------------------------------------------|----------------------------------|----------------------------------|
|                                                                       | Model 1 <sup>a</sup>             | Model 2 <sup>b</sup>             |
|                                                                       | AOR (95% CI)                     | AOR (95% CI)                     |
| Individual-level                                                      |                                  |                                  |
| Stimulant therapy for ADHD history                                    |                                  |                                  |
| Never                                                                 | REF                              | REF                              |
| Previous use                                                          | 2.60 (2.37, 2.85) <sup>***</sup> | 3.56 (3.31, 3.82) <sup>***</sup> |
| Current use                                                           | 2.51 (2.25, 2.81) <sup>***</sup> | 3.18 (2.92, 3.46) <sup>***</sup> |
| School-level                                                          |                                  |                                  |
| Percent of students reporting stimulant therapy for ADHD (continuous) | ---                              | 1.66 (1.05, 2.63) <sup>*</sup>   |

**Abbreviations:** NUPS, nonmedical use of prescription stimulants; AOR, adjusted odds ratio; CI, confidence interval; ADHD, attention-deficit/hyperactivity disorder.

**Notes:**

<sup>a</sup>“REF” refers to the reference category. “---” refers to variable not included in the model.

<sup>b</sup>Model 1 controls for sex, race, highest parental education level, grade point average, past two-week binge drinking, past 30-day cigarette use, past 30-day marijuana use and cohort year. Model 1 shows the results without controlling for school-level predictors/correlates.

<sup>c</sup>Model 2 and 3 controls for sex, race, highest parental education level, grade point average, past two-week binge drinking, past 30-day cigarette use, past 30-day marijuana use, cohort year, school type, grade level, urbanicity of school, school size, US Census region, percent of student body with low grades, percent of the student body that is female, percent of the student body with at least one parent with a college degree or higher, percent of the student body that is White, percent of the student body that has engaged in binge drinking during the past two weeks, percent of the student body that has engaged in cigarette use during the past 30 days, and the percent of the student body that has engaged in marijuana use during the past 30 days. This analysis includes individual-level medical use of stimulant therapy for ADHD history to predict individual-level past-year NUPS (the analyses in Table 3 did not include this individual-level predictor/correlate of stimulant therapy for ADHD). Model 2 and 3 includes both individual-level and school-level predictors/correlates to assess individual-level past-year NUPS.

\* $P < .05$ , \*\* $P < .01$ , \*\*\* $P < .001$ . \*Indicates a significant difference at the .05 alpha level or lower, \*\*Indicates a significant difference at the .01 alpha level or lower, and \*\*\*Indicates a significant difference at the .001 alpha level or lower.

**eTable 6. Bivariate correlations between prescription stimulant therapy for ADHD and nonmedical use of prescription stimulants by secondary school-level characteristics, 2005–2020**

| School-level characteristics                      | Current and past stimulant therapy for ADHD<br>b ( $\beta$ ) | P value <sup>a</sup> | Past-year NUPS<br>b ( $\beta$ ) | P value <sup>a</sup> |
|---------------------------------------------------|--------------------------------------------------------------|----------------------|---------------------------------|----------------------|
| Private status                                    |                                                              |                      |                                 |                      |
| Public school                                     | REF                                                          | REF                  | REF                             | REF                  |
| Catholic school                                   | -.006 (-.026)                                                | .044                 | -.014 (-.067)                   | < .001               |
| Private school                                    | .023 (.086)                                                  | < .001               | -.013 (-.057)                   | < .001               |
| Grade level                                       |                                                              |                      |                                 |                      |
| 8 <sup>th</sup>                                   | REF                                                          | REF                  | REF                             | REF                  |
| 10 <sup>th</sup>                                  | .004 (.030)                                                  | < .001               | .029 (.224)                     | < .001               |
| 12 <sup>th</sup>                                  | .011 (.077)                                                  | < .001               | .035 (.274)                     | < .001               |
| Urbanicity of school                              |                                                              |                      |                                 |                      |
| Urban                                             | REF                                                          | REF                  | REF                             | REF                  |
| Suburban                                          | .013 (.093)                                                  | <.001                | .012 (.097)                     | <.001                |
| Rural                                             | .008 (.053)                                                  | <.001                | .013 (.098)                     | <.001                |
| School size                                       | -.001 (-.030)                                                | .018                 | .001 (.063)                     | <.001                |
| US Census region                                  |                                                              |                      |                                 |                      |
| Northeast                                         | REF                                                          | REF                  | REF                             | REF                  |
| Midwest                                           | .009 (.058)                                                  | < .001               | .015 (.109)                     | < .001               |
| South                                             | .022 (.152)                                                  | < .001               | .014 (.111)                     | < .001               |
| West                                              | -.006 (-.034)                                                | .028                 | .008 (.055)                     | < .001               |
| Percent with low grades                           | .003 (.007)                                                  | .559                 | .026 (.060)                     | .559                 |
| Percent female                                    | -.045 (-.089)                                                | < .001               | -.020 (-.047)                   | < .001               |
| Parental education                                | .027 (.086)                                                  | < .001               | -.001 (-.001)                   | .917                 |
| Percent White                                     | .037 (.167)                                                  | < .001               | .035 (.185)                     | < .001               |
| Percent binge drinking                            | .080 (.140)                                                  | < .001               | .195 (.399)                     | < .001               |
| Percent cigarette smoking                         | .108 (.163)                                                  | < .001               | .239 (.424)                     | < .001               |
| Percent marijuana use                             | .074 (.126)                                                  | < .001               | .204 (.413)                     | < .001               |
| Percent stimulant therapy for ADHD                | NA                                                           | NA                   | .202 (.237)                     | < .001               |
| Percent nonmedical use of prescription stimulants | .278 (.237)                                                  | < .001               | NA                              | NA                   |

**Abbreviations:** ADHD, attention-deficit/hyperactivity disorder; NUPS, nonmedical use of prescription stimulants; b, unstandardized regression coefficient;  $\beta$ , standardized regression coefficient; REF, reference; NA, not applicable.

<sup>a</sup>Ordinary least squares (OLS) regression models were used to determine the standardized regression coefficient.

**eTable 7. Demographics for school-level characteristics**

| <b>School-level (measured at the school-level; continuous) (n = 5963)</b>  | <b>Mean (SD)</b> |
|----------------------------------------------------------------------------|------------------|
| Percent female                                                             | 50.9% (13.8%)    |
| Percent White                                                              | 55.9% (31.8%)    |
| Parental education (% with a BA or higher)                                 | 56.0% (22.3%)    |
| Percent with low grades (C+ or lower)                                      | 19.8% (14.0%)    |
| Percent binge drinking                                                     | 13.4% (12.4%)    |
| Percent cigarette smoking                                                  | 10.2% (10.7%)    |
| Percent marijuana use                                                      | 13.9% (12.2%)    |
| Percent stimulant therapy for ADHD                                         | 7.9% (7.1%)      |
| Percent nonmedical use of prescription stimulants (past-year)              | 5.7% (6.0%)      |
| School size                                                                | 208.6 (179.3)    |
| <b>School-level (measured at the school-level; categorical) (n = 5963)</b> | <b>% (n)</b>     |
| Grade level                                                                |                  |
| 8 <sup>th</sup>                                                            | 36.7 (2187)      |
| 10 <sup>th</sup>                                                           | 31.0 (1847)      |
| 12 <sup>th</sup>                                                           | 32.3 (1929)      |
| Private status                                                             |                  |
| Public school                                                              | 83.1 (4957)      |
| Catholic school                                                            | 9.4 (558)        |
| Private school                                                             | 7.5 (448)        |
| Urbanicity of school                                                       |                  |
| City                                                                       | 31.9 (1903)      |
| Suburban                                                                   | 38.9 (2321)      |
| Rural                                                                      | 29.2 (1739)      |
| US Census region                                                           |                  |
| Northeast                                                                  | 21.3 (1268)      |
| Midwest                                                                    | 25.5 (1519)      |
| South                                                                      | 33.7 (2012)      |
| West                                                                       | 36.7 (2187)      |

**Abbreviations:** SD, standard deviation; BA, bachelor's degree; ADHD, attention-deficit/hyperactivity disorder.

**Notes:**

% = weighted percent; n = unweighted sample size.

**eTable 8. Demographics for individual-level and school-level characteristics**

| Individual-level<br>(n = 231,141)              | Current and past stimulant<br>therapy for ADHD |                      | Past-year NUPS |                      |
|------------------------------------------------|------------------------------------------------|----------------------|----------------|----------------------|
|                                                | % (n)                                          | P value <sup>a</sup> | % (n)          | P value <sup>a</sup> |
| Sex                                            |                                                |                      |                |                      |
| Female                                         | 6.5 (6709)                                     | REF                  | 6.1 (6755)     | REF                  |
| Male                                           | 9.3 (8929)                                     | < .001               | 5.7 (6171)     | .004                 |
| Race/ethnicity                                 |                                                |                      |                |                      |
| White                                          | 9.2 (10578)                                    | REF                  | 6.9 (8592)     | REF                  |
| Non-White                                      | 6.3 (5689)                                     | < .001               | 4.7 (4777)     | < .001               |
| Parental education                             |                                                |                      |                |                      |
| Less than a BA                                 | 7.5 (6217)                                     | REF                  | 6.7 (6081)     | REF                  |
| BA or higher                                   | 8.3 (9018)                                     | < .001               | 5.6 (6592)     | < .001               |
| Grade point average                            |                                                |                      |                |                      |
| B- or higher                                   | 6.9 (11136)                                    | REF                  | 5.0 (8728)     | REF                  |
| C+ or lower                                    | 12.2 (4820)                                    | < .001               | 9.5 (4278)     | < .001               |
| Binge drinking (2-week)                        |                                                |                      |                |                      |
| No                                             | 6.7 (11127)                                    | REF                  | 3.3 (6188)     | REF                  |
| Yes                                            | 13.3 (3516)                                    | < .001               | 21.3 (6095)    | < .001               |
| Cigarette use (30-day)                         |                                                |                      |                |                      |
| No                                             | 6.9 (12512)                                    | REF                  | 3.7 (7548)     | REF                  |
| Yes                                            | 16.9 (3390)                                    | < .001               | 26.1 (5677)    | < .001               |
| Marijuana use (30-day)                         |                                                |                      |                |                      |
| No                                             | 6.9 (11721)                                    | REF                  | 3.1 (5929)     | REF                  |
| Yes                                            | 13.6 (3910)                                    | < .001               | 22.7 (7159)    | < .001               |
| Current and past stimulant<br>therapy for ADHD |                                                |                      |                |                      |
| No                                             | NA                                             | NA                   | 5.1 (9417)     | REF                  |
| Yes                                            | NA                                             | NA                   | 16.7 (2645)    | < .001               |
| Past-year NUPS                                 |                                                |                      |                |                      |
| No                                             | 7.0 (13203)                                    | REF                  | NA             | NA                   |
| Yes                                            | 21.9 (2645)                                    | < .001               | NA             | NA                   |
| Cohort year                                    |                                                |                      |                |                      |
| 2005–2009                                      | 8.3 (5783)                                     | REF                  | 6.4 (4936)     | REF                  |
| 2010–2014                                      | 8.0 (5427)                                     | .282                 | 6.2 (4460)     | .309                 |
| 2015–2020                                      | 7.6 (5057)                                     | .002                 | 5.2 (3973)     | < .001               |

**Abbreviations:** ADHD, attention-deficit/hyperactivity disorder; NUPS, nonmedical use of prescription stimulants; REF, reference; BA, bachelor's degree; NA, not applicable.

**Notes:**

% = weighted percent; n = unweighted sample size.

<sup>a</sup>Binary logistic regression models were used to determine statistically significant differences between groups.
